# Supplementary material for: Nervous System Development and Neuropeptides Characterization in Embryo and Larva: Insights from a Non-Chordate Deuterostome, the Sea Cucumber Apostichopus japonicus
Source: MDPI journal article supplement (doi:10.3390/biology11101538), 2022-10-20
Supplement: s1 [file s1]

**Supplementary Table S1.** Primer sequences used in the RACE and qRT-PCR amplifications.

| Gene name             | Primer sequences (5' → 3')    | Usage   |
|-----------------------|-------------------------------|---------|
| <i>AjPPLN2P</i>       | TTTGTCTGCGCGCCTGTGTATTGA      | RACE    |
| <i>AjTRHP</i>         | CGGGAGGAGACCTAGATGGCCTGGA     |         |
| <i>AjMS21P</i>        | ACGAGAACCCTGTTGCTGTTTGTGTGCC  |         |
| <i>AjCTP</i>          | CGAGCTGTGTGCGATAACATTACGCATGG |         |
| <i>AjHolotocinP</i>   | TGGCTAGGCTTTCAGTGTGTGGAGT     |         |
| <i>AjPPLN2P-F</i>     | AGAGACGCAGAGAAGAGATT          | qRT-PCR |
| <i>AjPPLN2P-R</i>     | TCTTGCCGCCTATCATACT           |         |
| <i>AjTRHP-F</i>       | GGACAAGCAATGGATGACAA          |         |
| <i>AjTRHP-R</i>       | ATCACCTCCTGGCAGTTG            |         |
| <i>AjMS21P-F</i>      | ACCCTGTTGCTGTTTGTG            |         |
| <i>AjMS21P-R</i>      | CATCATTCCTGGCTCTACC           |         |
| <i>AjCTP-F</i>        | GTTTGGCGGTACCCATTAC           |         |
| <i>AjCTP-R</i>        | GGCGTTCGGTCTGTTAATAG          |         |
| <i>AjHolotocinP-F</i> | ATGTGTTCTGTGCCGCTCTT          |         |
| <i>AjHolotocinP-R</i> | GCAATGGTCTCCTACGACTTCA        |         |
| <i>AjKPP-F</i>        | CTGTCATTGCTCTGTGGAA           |         |
| <i>AjKPP-R</i>        | GGTCATCTTCGTCTTGTTCT          |         |
| <i>AjOXP1-F</i>       | CCTCCTCCTCCTCAACAT            |         |
| <i>AjOXP1-R</i>       | GTGCTCGTCGTGATAGTC            |         |
| <i>AjOXP2-F</i>       | TTGTTCCAAGATCCGTGATT          |         |
| <i>AjOXP2-R</i>       | TTCCAGCGTATGTCCGAT            |         |
| <i>AjGnRHP-F</i>      | AGGACGGACATCAACTCTG           |         |
| <i>AjGnRHP-R</i>      | GGACTCTATCATCGAAGCAAT         |         |
| <i>AjBAP-F</i>        | CGTCAAGCAGATTCAGCAA           |         |
| <i>AjBAP-R</i>        | TGTTAGCGTTACCTTCACTT          |         |
| $\beta$ -Actin-F      | AAGGTTATGCTCTTCCTCACGCT       |         |
| $\beta$ -Actin-R      | GATGTCACGGACGATTTACAG         |         |
| $\beta$ -Tubulin-F    | GAAAGCCTTACGACGGAACA          |         |
| $\beta$ -Tubulin-R    | CACCACGTGGACTCAAAATG          |         |
