# Supplementary material for: Nervous System Development and Neuropeptides Characterization in Embryo and Larva: Insights from a Non-Chordate Deuterostome, the Sea Cucumber Apostichopus japonicus
Source: MDPI journal article supplement (doi:10.3390/biology11101538), 2022-10-20
Supplement: s1 [file s1]

**Supplementary Table S1.** Primer sequences used in the RACE and qRT-PCR amplifications.

**Supplementary Figure S1.** Negative controls of nervous system immunostaining in embryo and larvae of *A. japonicus* by incubating with 1xPBS to verify the specificity of the primary antibody. DAPI was used for nuclear staining (blue). (A) blastula; (B) gastrula; (C) late-gastrula; (D) auricularia; (E) doliolaria; (F) pentactula.

**Supplementary Data S1.** The identity percentage of the hits for the results of tBLASTn-based analysis.
