# Supplementary material for: Nervous System Development and Neuropeptides Characterization in Embryo and Larva: Insights from a Non-Chordate Deuterostome, the Sea Cucumber Apostichopus japonicus
Source: Biology (Basel). 2022 Oct 20;11(10):1538. doi: 10.3390/biology11101538 (PMC9598280; doi:10.3390/biology11101538)
Supplement: Supplementary file 1 [file biology-11-01538-s001.zip]

Archive with 4 entries (4 files):
- Legends for supplementary materials.pdf
- Supplementary Data S1.xlsx
- Supplementary Figure S1.tif
- Supplementary Table S1.pdf
