# Supplementary material for: Nervous System Development and Neuropeptides Characterization in Embryo and Larva: Insights from a Non-Chordate Deuterostome, the Sea Cucumber Apostichopus japonicus
Source: Biology (Basel). 2022 Oct 20;11(10):1538. doi: 10.3390/biology11101538 (PMC9598280; doi:10.3390/biology11101538)
Supplement: Supplementary file 1 [file biology-11-01538-s001.zip › Supplementary Data S1.xlsx]

## Sheet: Sheet1
		Blastula (%)	Gastrula (%)	Auricularia (%)	Pentactula (%)
Classification	Neuropeptide precursor
A. japonicus proteins that are precursors of neuropeptides belonging to known bilaterian	Vasopressin/oxytocin-type precursor (HolotocinP)	/	100	100	100
neuropeptide families	NPS/CCAP-type precursor (NGIWYaP)	/	/	100	100
	Gonadotropin-releasing hormone-type precursor (GnRHP)	100	100	100	100
	Corazonin-type precursor (CRZP)	/	/	/	100
	Cholecystokinin-type precursor 1 (CCKP1)	/	/	/	100
	Cholecystokinin-type precursor 2 (CCKP2)	/	/	100	100
	Thyrotropin-releasing hormone-type precursor (TRHP)	/	/	100	100
	Orexin-type precursor 1 (OXP1)	98.387	100	98.693	98.387
	Orexin-type precursor 2 (OXP2)	/	/	100	99.138
	Luqin-type precursor (LQP)	/	100	100	100
	Kisspeptin-type precursor (KPP)	/	/	100	100
	Calcitonin-type precursor 1 (CTP1)	/	/	100	100
	Calcitonin-type precursor 2 (CTP2)	100	/	100	/
	Pigment-dispersing factor-type precursor 1a (PDFP1a)	/	/	100	100
	Pigment-dispersing factor-type precursor 1b (PDFP1b)	/	/	100	100
	Pedal peptide-type precursor 2 (PPLNP2)	100	100	100	100
	Somatostatin-type precursor 1 (SSP1 or NP19)	/	/	/	100
	Somatostatin-type precursor 2 (SSP2 or NP16)	/	/	/	99.281
	Glycoprotein hormone alpha-2-type precursor 1 (GPA2P1)	/	100	100	100
	Glycoprotein hormone alpha-2-type precursor 2 (GPA2P2)	/	/	100	100
	Glycoprotein hormone beta-5-type precursor (GPB5P)	/	100	100	/
	Bursicon alpha-type precursor (BAP or BALPP)	100	100	100	99.324
	Bursicon beta-type precursor (BBP or BBLPP)	100	/	/	/
	Insulin-like peptide precursor (ILPP)	/	100	100	92.405
A. japonicus neuropeptide precursors that have thus far only been found in echinoderms	L-type SALMFamide precursor (L-SALMFaP)	100	/	100	98.864
	F-type SALMFamide precursor (F-SALMFaP)	/	98.551	100	/
	AN peptide precursor (ANPP)	/	/	/	100
	Neuropeptide precursor 9 (NP9)	100	95.918	95.918	100
	Neuropeptide precursor 11 (NP11)	/	100	100	100
	Neuropeptide precursor 15 (NP15)	100	100	/	100
	Neuropeptide precursor 18 (NP18)	/	100	100	98.701
	Neuropeptide precursor 23 (NP23)	/	/	99.219	/
	Neuropeptide precursor 25 (NP25)	/	/	100	100
Proteins that are precursors of bioactive peptides that have been discovered previously in A.	GLRFA precursor (GLRFA-P)	/	/	100	97.619
japonicus	GN19 precursor (GN19P)	/	/	100	100
	Stichopin precursor (StichopinP)	/	/	/	94.118
	SWYG precursor 2 (SWYGP2)	/	/	/	/
	SWYG precursor 3 (SWYGP3)	96.739	98.684	/	99.342
	APHAIRPPSG precursor (AG10P)	/	100	/	/
	GYWKDLDNYVKAHKT precursor (GT15P)	/	/	/	/
	MPMNPADYFSRGTVYIPTRDS precursor (MS21P)	/	/	98.901	100
Other novel putative neuropeptide precursors identified in A. japonicus	Neuropeptide precursor 11-like precursor (NP11LP)	/	/	/	100
	neuropeptide precursor 14-like precursor (NP14LP)	/	/	/	/
	GLRFA precursor-like precursor (GLRFALP)	/	/	/	/
Note: the number emans identity of tBLASTn; /, not idenfied
